# Supplementary material for: Recall of advertisements after various lapses of time
Source: Psychol Res. 2020 Sep 17;85(6):2428–43. doi: 10.1007/s00426-020-01408-y (PMC8357737; doi:10.1007/s00426-020-01408-y)
Supplement: Supplementary file 2 — Supplementary file2 (XLS 42 kb) [file 426_2020_1408_MOESM2_ESM.xls]

## Sheet: Sources of repetitions 
Donald Laming:		Recall of advertisements after various lapses of time
FIGURE 3	Sources of repeated errors
Category of repetition
	No of test trials when designated category of repetition was observed from specified source
Source	BPS	BP	BS	PS	Ans0	Ans	cpr	ypr	ygs	Null	Totals
BPS	2472	0	0	0	0	0	0	0	0	0	2472
BP	345	43	0	0	2	4	0	3	0	0	397
BS	153	0	13	0	0	0	0	1	0	0	167
PS	300	0	0	35	1	2	0	2	0	0	340
Ans0	0	15	5	14	3	12	18	19	15	36	137
Ans	0	107	24	69	17	96	39	35	34	74	495
cpr	0	31	23	15	9	21	34	33	35	203	404
ypr	42	29	6	27	7	37	28	19	10	105	310
ygs	159	0	0	0	0	0	0	0	0	0	159
Null	0	0	0	0	0	0	0	0	0	999	999
											5880
	No of test trials when designated category of repetition might have been observed from specified source
Source	BPS	BP	BS	PS	Ans0	Ans	cpr	ypr	ygs	Null	Totals
BPS	5880	0	0	0	0	0	0	0	0	0	5880
BP	3560	204	0	0	19	36	16	28	57	0	3920
BS	3732	0	92	0	4	13	14	17	48	0	3920
PS	3561	0	0	175	13	29	27	39	76	0	3920
Ans0	4	16	6	18	3	14	21	21	18	165	286
Ans	0	339	133	284	49	147	147	142	141	645	2027
cpr	0	104	66	99	21	36	86	68	77	482	1039
ypr	400	129	69	130	55	175	180	124	58	479	1799
ygs	1856	0	0	0	0	0	0	0	0	0	1856
Null	0	0	0	0	0	0	0	0	0	0	0

## Sheet: BPS Trees
Donald Laming:		Recall of advertisements after various lapses of time
FIGURE 4	Tree diagrams
	No of cases	1st test	2nd test	3rd test
BPS tree
	1960	745	672	646	BPS
				26
			73	37
				36
		1215	176	124
				52
			1039	72
				967
Answer tree
	1721	399	96	0
				3
			76	0
				0
		1322	0	0
				0
			0	0
				0
Roman numerals indicate completely correct repetition of the root of the tree. Italics indicate failure.

## Sheet: Lag recall 
Donald Laming:	Recall of advertisements after various lapses of time
FIGURE 5	Lag-recall curves for answers, cued pairs and yoked pairs
Lag	0	1	2	3	4	5	6	7	8	9	10	11	12	13	14	15	16	17	18	19	20	21	22	23	24	25	26	27	28	29
Repetitions of complete answers																															BPS recalls
No. repetitions	137	53	48	56	21	26	39	32	11	90	14	8	17	8	7	9	10	1	10	22	1	6	0	2	1	1	0	1	1	0	2472
No. failures	149	153	95	137	130	110	149	135	48	1774	102	68	105	76	91	84	93	32	65	225	14	50	31	33	35	31	11	13	8	0
Total no trials	286	206	143	193	151	136	188	167	59	1864	116	76	122	84	98	93	103	33	75	247	15	56	31	35	36	32	11	14	9	0	5880
Repetitions of BP pairs																															BP recalls
No. repetitions	13	14	9	10	5	8	9	9	6	5	3	6	6	8	5	0	6	4	6	2	0	0	0	1	2	1	0	0	0	0	397
No. failures	47	62	27	50	53	31	49	56	22	105	38	19	41	18	32	35	28	8	26	37	4	10	8	4	9	4	1	4	0	0
Total no trials	60	76	36	60	58	39	58	65	28	110	41	25	47	26	37	35	34	12	32	39	4	10	8	5	11	5	1	4	0	0	2253
Repetitions of BS pairs																															BS recalls
No. repetitions	7	3	3	4	2	10	5	5	4	11	2	3	2	5	2	3	3	1	1	0	0	1	0	2	2	0	0	0	0	0	167
No. failures	58	65	36	55	51	45	40	70	25	96	49	34	50	29	41	27	40	20	35	51	4	16	11	14	8	10	8	4	2	0
Total no trials	65	68	39	59	53	55	45	75	29	107	51	37	52	34	43	30	43	21	36	51	4	17	11	16	10	10	8	4	2	0	2288
Repetitions of PS pairs																															PS recalls
No. repetitions	10	16	15	13	20	13	13	13	3	13	10	4	7	4	5	9	4	1	2	3	1	2	0	1	1	1	1	0	0	0	340
No. failures	56	71	30	46	36	35	50	45	19	90	25	21	36	26	33	35	33	18	20	47	7	16	10	13	11	11	5	0	2	0
Total no trials	66	87	45	59	56	48	63	58	22	103	35	25	43	30	38	44	37	19	22	50	8	18	10	14	12	12	6	0	2	0	2275
Repetitions of yoked pairs																															Yoked guesses
No. repetitions	15	24	20	26	21	16	26	19	26	19	18	15	7	10	13	9	7	3	8	2	0	3	1	1	1	0	0	0	0	0	159
No. failures	1555	1475	1463	1343	1285	1231	1145	1103	1066	900	940	871	825	789	712	656	617	547	496	403	360	315	290	260	204	162	109	77	36	0
Total no trials	1570	1499	1483	1369	1306	1247	1171	1122	1092	919	958	886	832	799	725	665	624	550	504	405	360	318	291	261	205	162	109	77	36	0	2504
0

## Sheet: Sheet2
Donald Laming:	Recall of advertisements after various lapses of time
FIGURE 6	Retrievals from the original stimuli
		No of test trials when designated category of retrieval was observed
	Categories of responses	Perfumes	Holidays	Cosmetics	Food and drink	Shoes	Fashion	High technology	Furniture	Jewellery	Totals
	Hours delay	0.5	1	2	14.6	72	168	336	1512	2668
	BPS	53	98	53	106	61	28	43	25	10	477
	BP	24	21	15	6	24	16	14	26	17	163
	BS	9	0	14	0	5	13	8	9	17	75
	PS	20	4	17	4	23	14	33	16	17	148
	Answer (lag 0)	0	0	0	0	0	0	0	0	0	0
	Answer (lag > 0)	0	0	0	0	0	0	0	0	0	0
	Cued pair	0	0	0	0	0	0	0	0	0	0
	Yoked pair	0	0	0	0	0	0	0	0	0	0
	Yoked guess	10	2	9	2	6	15	10	13	17	84
	Null	0	0	0	0	0	0	0	0	0	0
	Total	116	125	108	118	119	86	108	89	78	947
		No of test trials when designated category of retrieval might have been observed
	Categories of responses	Perfumes	Holidays	Cosmetics	Food and drink	Shoes	Fashion	High technology	Furniture	Jewellery	Totals
	Hours delay	0.5	1	2	14.6	72	168	336	1512	2668
	BPS	238	151	224	130	194	245	226	250	283	1941
	BP	60	26	53	13	61	66	64	63	82	488
	BS	58	21	65	19	41	66	56	62	61	449
	PS	52	27	62	12	46	66	64	63	63	455
	Answer (lag 0)	0	0	0	0	0	0	0	0	0	0
	Answer (lag > 0)	0	0	0	0	0	0	0	0	0	0
	Cued pair	0	0	0	0	0	0	0	0	0	0
	Yoked pair	0	0	0	0	0	0	0	0	0	0
	Yoked guess	181	44	169	24	133	217	183	226	273	1450
	Null	0	0	0	0	0	0	0	0	0	0
	Total	589	269	573	198	475	660	593	664	762	4783
